# Supplementary material for: Effect of the length of polyoxyethylene substituents on luminescent bimetallic lanthanide bioprobes
Source: Royal Society of Chemistry journal article supplement (doi:10.1039/b800516h), 2008-01-01
Supplement: b800516h.pdf [file b800516h.pdf]

**Effect of the length of polyoxyethylene substituents on luminescent bimetallic  
lanthanide bioprobes**

**Emmanuel Deiters, Bo Song, Anne-Sophie Chauvin, Caroline D. B. Vandevyver, and Jean-  
Claude G. Bünzli**

**Electronic Supplementary Information**

**10 pages**

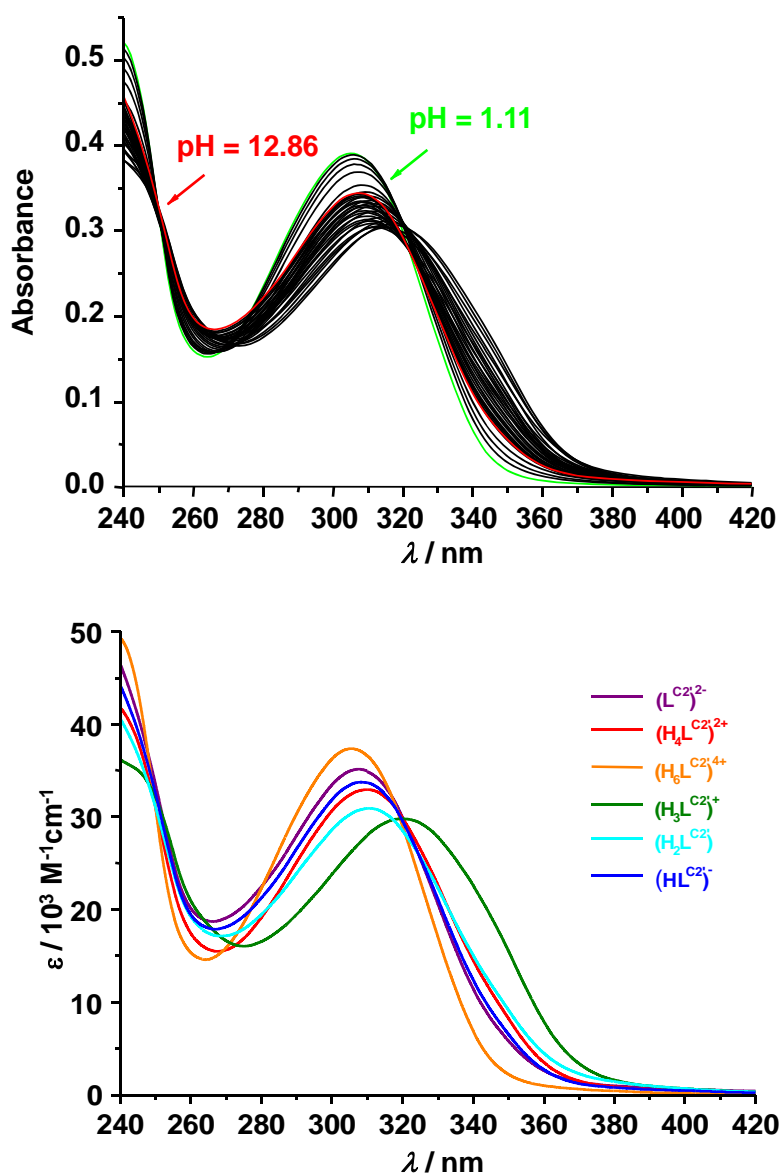

Figure S1. (Top) UV-vis spectra of  $\text{H}_2\text{L}^{\text{C}2'}$   $1.06 \times 10^{-5}$  M versus pH,  $T = 298$  K,  $\mu = 0.1$  M (KCl). (Bottom). Recalculated absorption spectra of the various species evidenced during titration with NaOH.

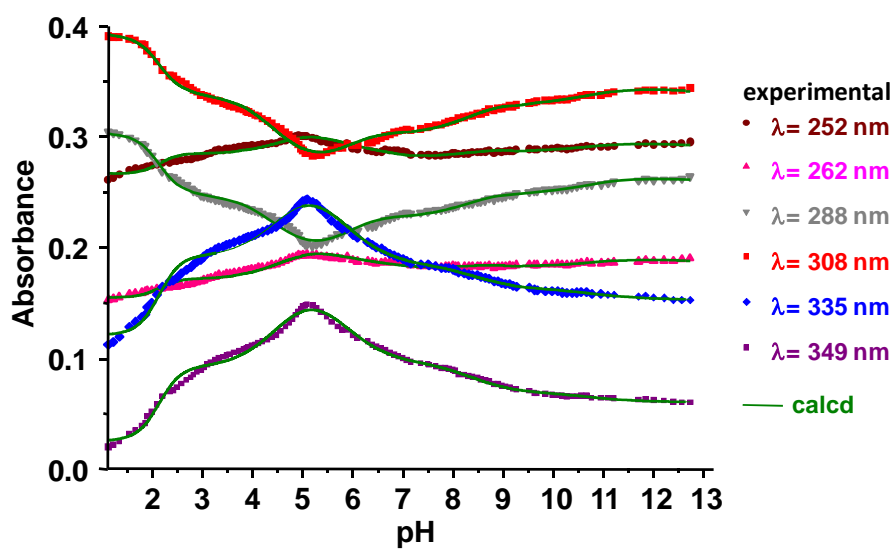

Figure S2. Comparison of the absorbance at six different wavelengths versus pH with re-calculated absorbance during the titration of  $H_2L^{C2-}$  with NaOH.

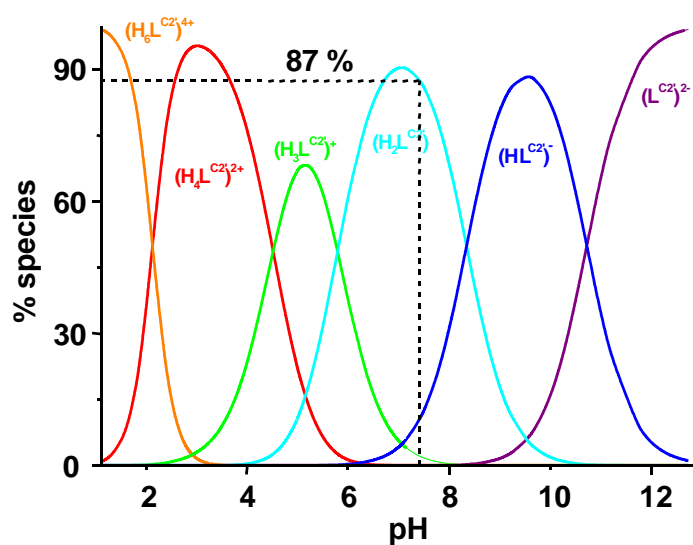

Figure S3. Distribution diagram for  $H_2L^{C2-}$  as computed from the  $pK_a$ s reported in the text.

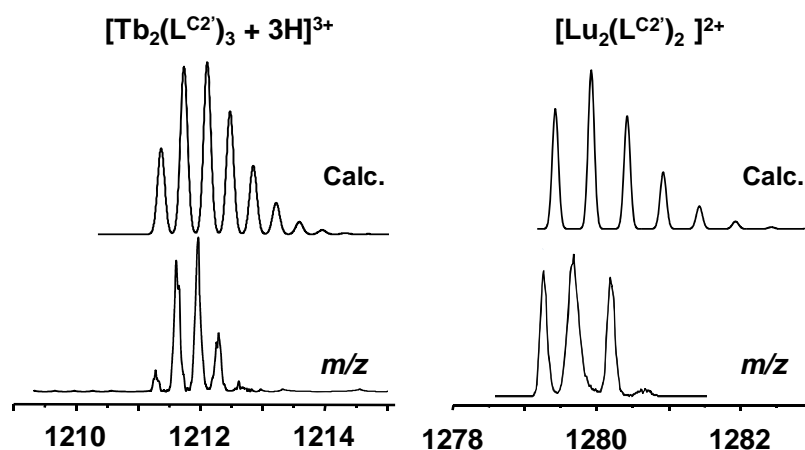

Figure S4. Measured and calculated isotopic distributions for a 2:3 and a 2:2 complex species.

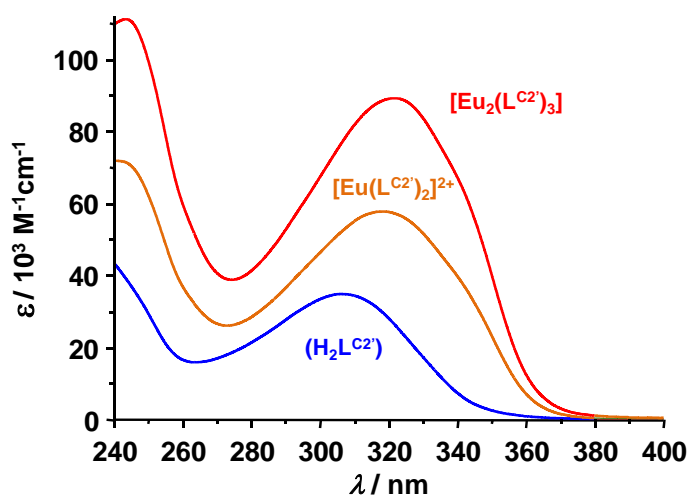

Figure S5. Re-calculated spectra from the titration of  $\text{H}_2\text{L}^{\text{C}2'}$  by europium perchlorate.

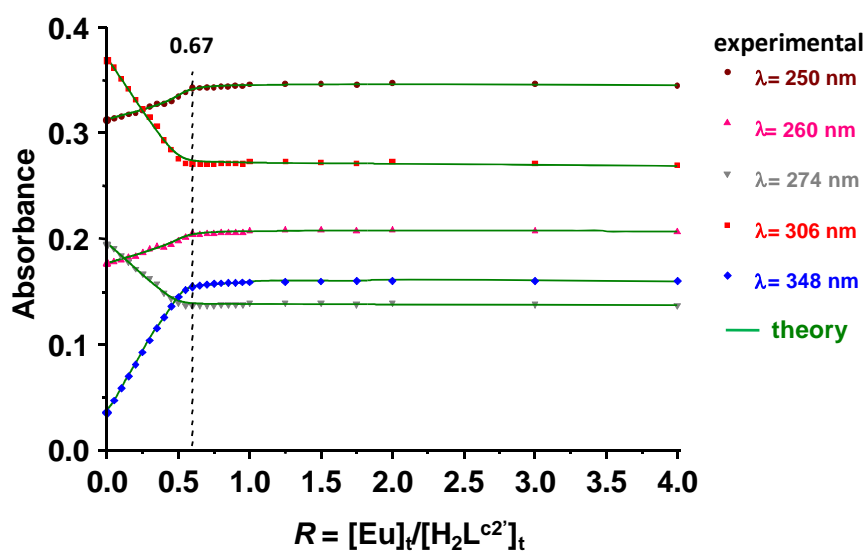

Figure S6. Absorbance values extracted at different wavelengths during the titration of  $\text{H}_2\text{L}^{\text{C}2'}$  by europium perchlorate.

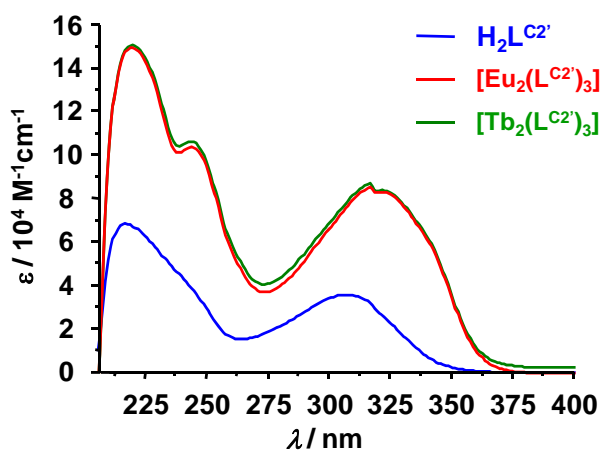

Figure S7. Molar absorption of  $\text{H}_2\text{L}^{\text{C}2'}$  and of the  $\text{Eu}^{\text{III}}$  and  $\text{Tb}^{\text{III}}$  helicates at room temperature in Tris-HCl 0.1 M.

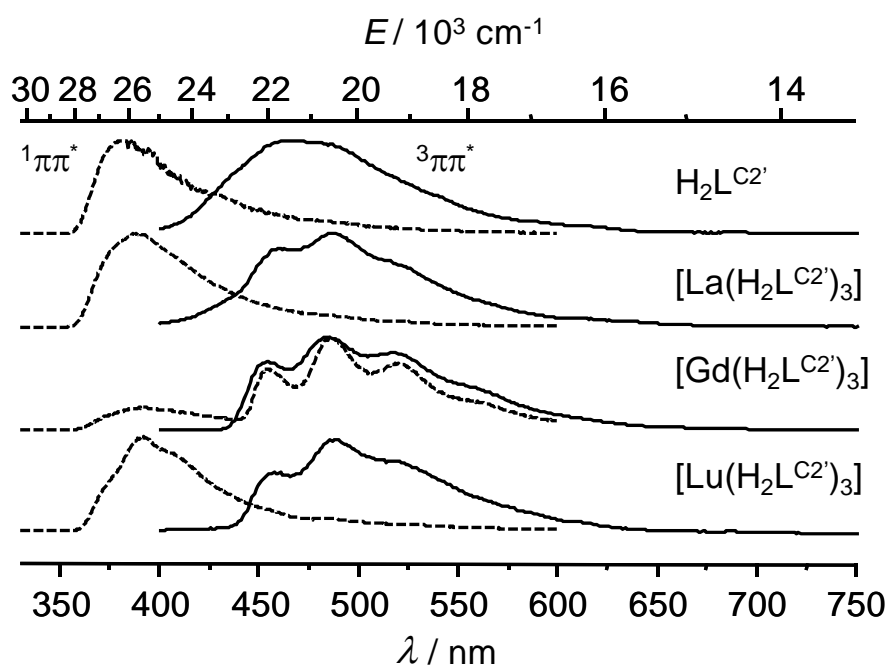

Figure S8. Normalized luminescence spectra of  $\text{H}_2\text{L}^{\text{C}2'}$  and its helicates with non-luminescent  $\text{Ln}^{\text{III}}$  ions, measured at 77 K in buffered aqueous solution (pH 7.4, Tris-HCl 0.1 M) containing 10 % of glycerol; dotted lines: without time delay; plain lines: with a 0.05 ms time delay;  $[\text{H}_2\text{L}^{\text{C}2'}] = 4.1 \times 10^{-5}$  M,  $[\text{Ln}_2(\text{L}^{\text{C}2'})_3] = 1.4 \times 10^{-5}$  M.

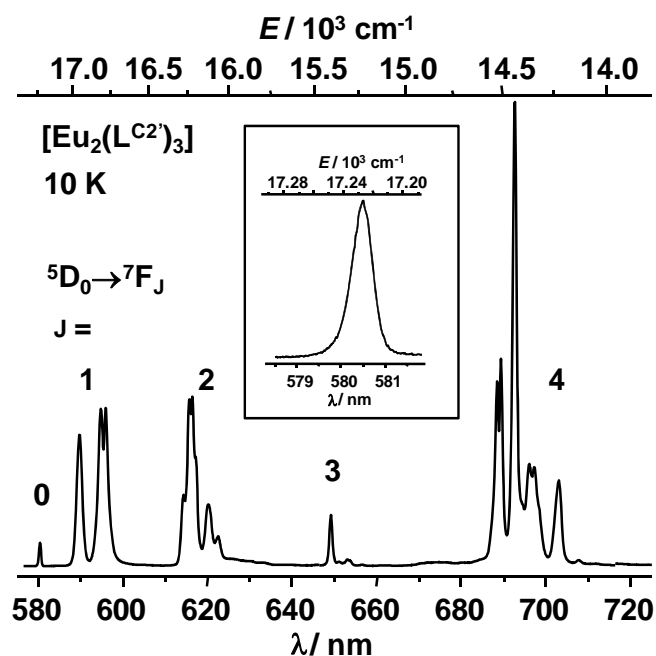

Figure S9. High-resolution emission spectrum of a frozen solution of  $[\text{Eu}_2(\text{L}^{\text{C}2'})_3]$   $2.5 \times 10^{-4}$  M in Tris-HCl (pH 7.4) recorded at 10 K under excitation at 331 nm. Insert: detail of the  ${}^5\text{D}_0 \rightarrow {}^7\text{F}_0$  transition.

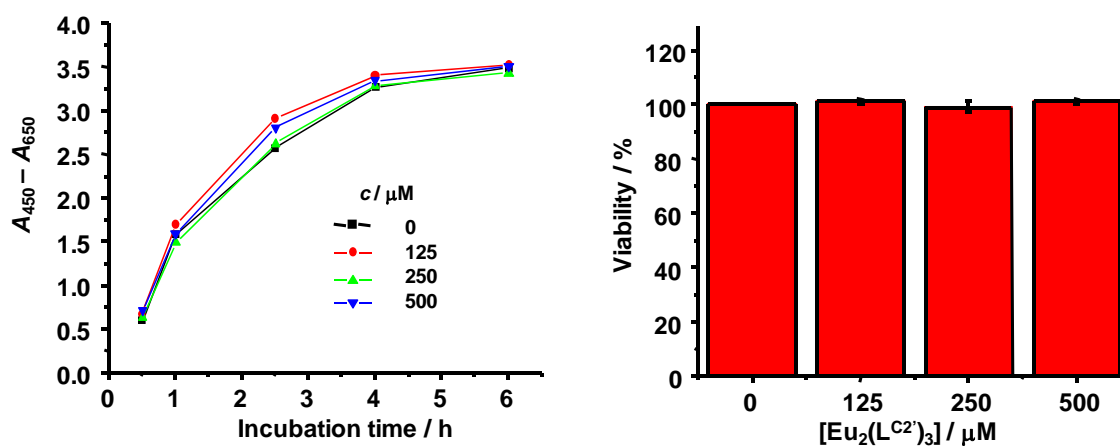

Figure S10. (Left) WST-1 proliferation test of HeLa cells in absence or presence of various concentrations of  $[\text{Eu}_2(\text{L}^{\text{C}2'})_3]$ . Each point is the average of three nominally identical

measurements. (Right). HeLa cell viability (WST-1 test) after 24h incubation with different concentrations of  $[\text{Eu}_2(\text{L}^{\text{C}2'})_3]$ .

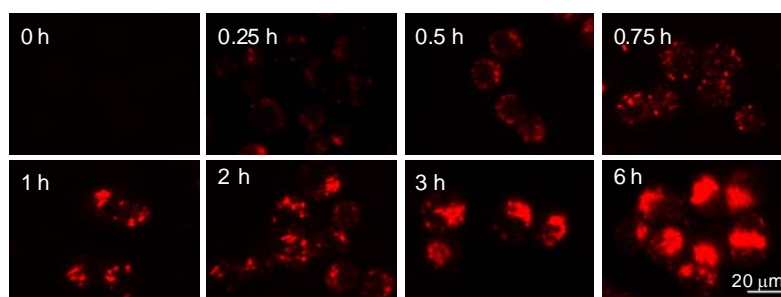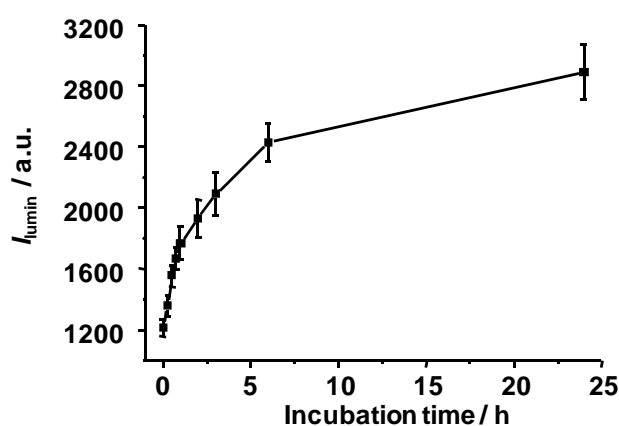

Figure S11. Time course of the  $[\text{Eu}_2(\text{L}^{\text{C}2'})_3]$  complex loading into HeLa cells. The cells were incubated in the presence of  $500 \mu\text{M}$  of the complex in cell culture medium at  $37^\circ\text{C}$ . The images were taken using a Zeiss luminescence microscope Axiovert S100 (Objective: Plan-Neofluar,  $20\times$ ;  $\lambda_{\text{exc}} = 330 \text{ nm}$ , emission filter = LP 585 filter, acquisition time 60 s).

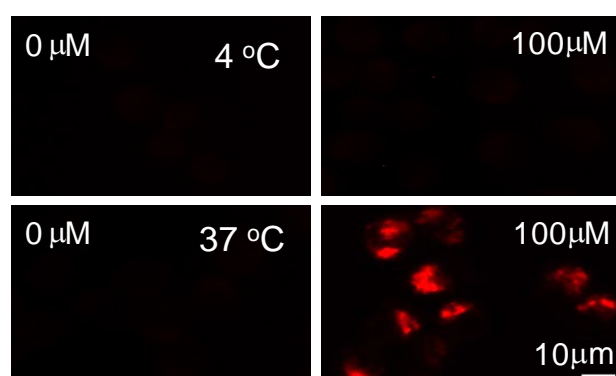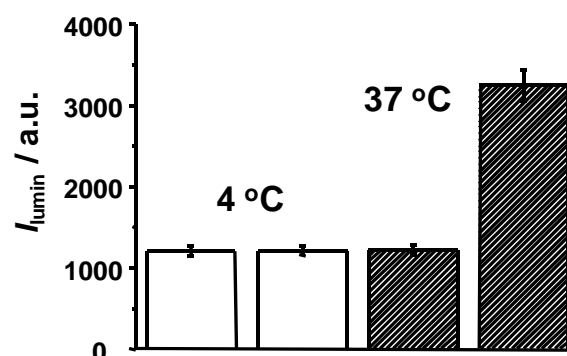

Figure S12. HeLa cells were incubated in presence of  $100 \mu\text{M}$   $[\text{Eu}_2(\text{L}^{\text{C}2'})_3]$  in RPMI-1640 for 7 h at  $4^\circ\text{C}$  or  $37^\circ\text{C}$ . The images were taken using a Zeiss luminescence microscope Axiovert S100 (Objective: Plan-Neofluar, 20x ;  $\lambda_{\text{exc}} = 330 \text{ nm}$ , emission filter = LP 585 filter, exposure time 60 s).

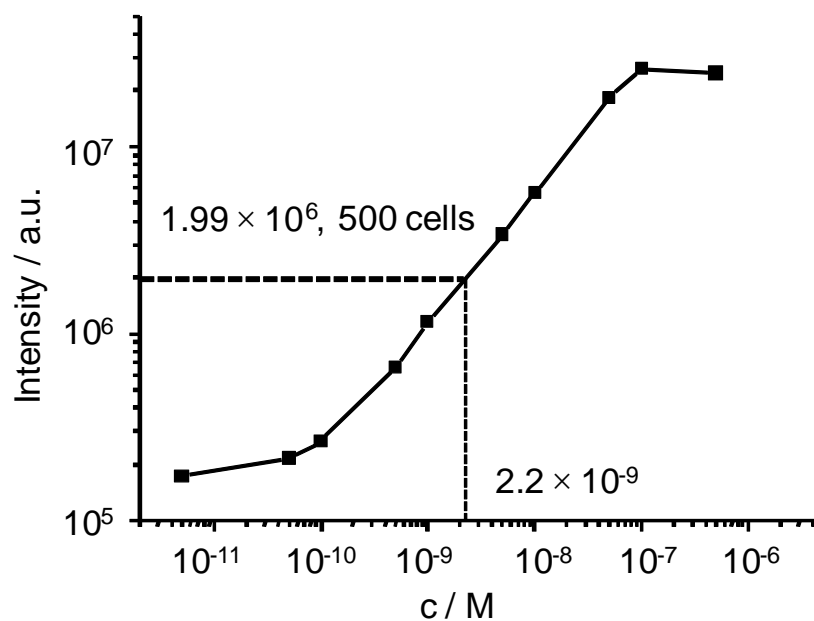

Figure S13. Quantitation of the intracellular concentration of  $[\text{Eu}_2(\text{L}^{\text{C}2'})_3]$  using the Delfia<sup>®</sup> method. Each point represents the average of four nominally identical measurements.



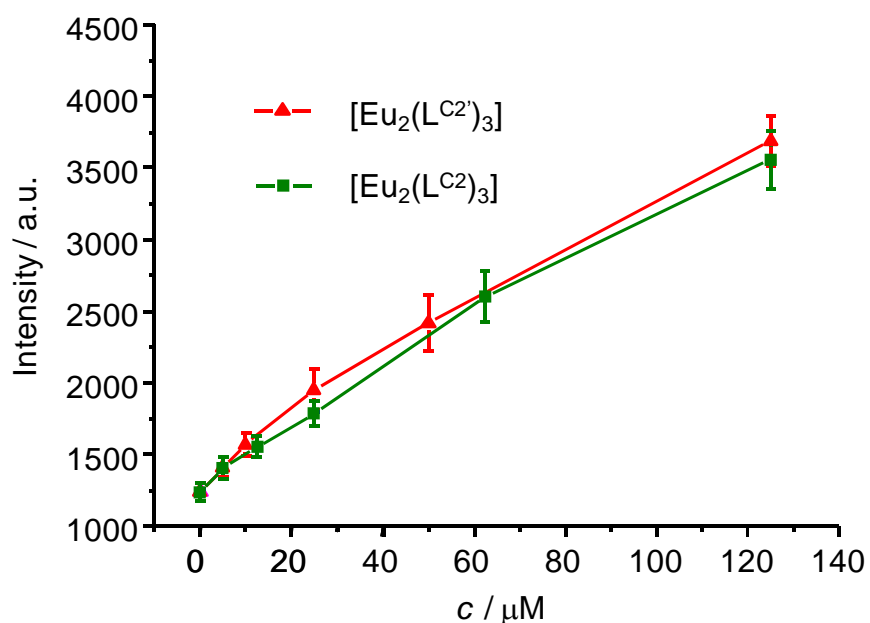

Figure S14. Loading concentration dependence of the emitted luminescence for [Eu<sub>2</sub>(L<sup>C2'</sup>)<sub>3</sub>] (red curve) and [Eu<sub>2</sub>(L<sup>C2</sup>)<sub>3</sub>] (green curve). HeLa cells were incubated 7h at 37 °C. The images were taken on a Zeiss luminescence microscope Axiovert S 100 (objective: Plan-Neofluor 20 x; λ<sub>exc</sub>: 330 nm; emission filter: LP 585; exposure time: 60 s).

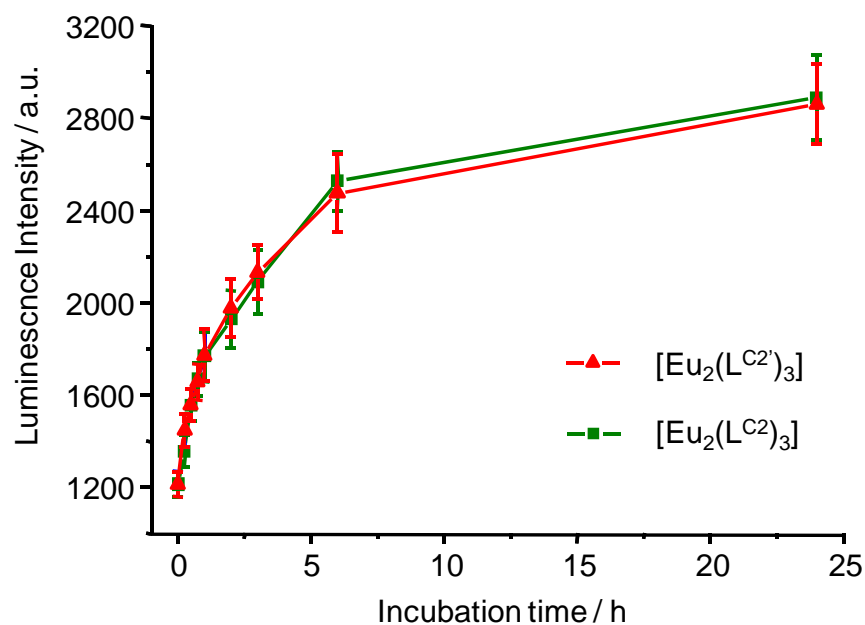

Figure S15. Time-course dependence of the emitted luminescence for  $[\text{Eu}_2(\text{L}^{\text{C}2'})_3]$  (red curve) and  $[\text{Eu}_2(\text{L}^{\text{C}2})_3]$  (green curve). The cells were incubated at 37 °C in presence of 500  $\mu\text{M}$  helicate. Same imaging conditions as for Figure S14.
